# Supplementary material
Source: Springer Nature journal article supplement (https://www.springermedizin.de/resource/supplementary/12904_2003_7_MOESM4_ESM.pdf/9517910)
Supplement: MOESM4 [file 9517910]

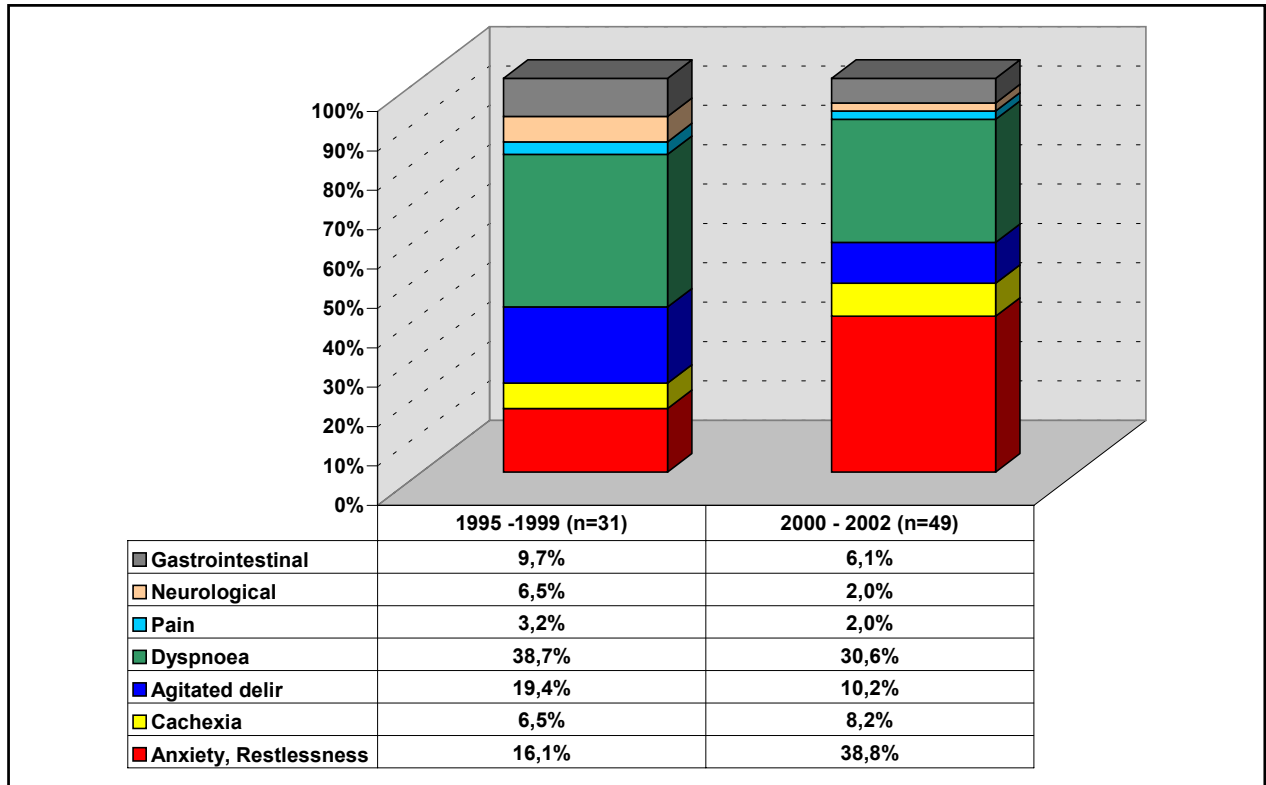

Figure 4 Main indication leading to sedation in the final phase (comparison of the periods 1995-1999 and 2000-2002) in PCU Havelhoehe
